# Supplementary material for: Assessment of Skin Deep Layer Biochemical Profile Using Spatially Offset Raman Spectroscopy
Source: MDPI journal article supplement (doi:10.3390/app11209498), 2021-10-13
Supplement: s1 [file s1]

## Article

# Assessment of Skin Deep Layer Biochemical Profile Using Spatially Offset Raman Spectroscopy

Martha Z. Vardaki <sup>1,\*</sup>, Konstantinos Seretis <sup>2</sup>, Georgios Gaitanis <sup>3</sup>, Ioannis D. Bassukas <sup>3</sup>  
and Nikolaos Kourkouvelis <sup>1</sup>

<sup>1</sup> Department of Medical Physics, School of Health Sciences, University of Ioannina, 45110 Ioannina, Greece; nkourkou@uoi.gr

<sup>2</sup> Department of Plastic Surgery, School of Health Sciences, University of Ioannina, 45110 Ioannina, Greece; drseretis@uoi.gr

<sup>3</sup> Department of Skin and Venereal Diseases, School of Health Sciences, University of Ioannina, 45110 Ioannina, Greece; ggaitan@uoi.gr (G.G.); ibassuka@uoi.gr (I.D.B.)

\* Correspondence: m.vardaki@uoi.gr

**Featured Application:** This study employs a spatially offset spectroscopic approach with a potential applicability to in vivo skin cancer screening.

## Supplementary Materials:

Gelatin-gel based phantom matrix protocol:

1. Add porcine gelatin to deionized water (5 gr gelatin in 200 ml H<sub>2</sub>O) and place the mixture in a glass beaker on a hot/stirring plate;
2. Heat the mixture of gelatin and water to a temperature of 50°C, while stirring with a magnetic stirring bar until the gelatin dissolves completely and the solution turns transparent;
3. Water-bath gelatin-water solution in a larger beaker and add 10 ml of IL (20% emulsion, Sigma-Aldrich);
4. Cover beakers with foil and stir for 30 minutes;
5. Let cool down to room temperature;
6. Repeat steps 1-4 for top layer using: 1 gr of gelatin in 40 ml H<sub>2</sub>O, 5 ml IL;
7. Let cool down to room temperature;
8. Pour mixture at the top of bottom layer.

A parafilm layer was placed at the top of gelatin matrix either between steps 7 and 8 (tissue phantoms type B) or at the end of the procedure (tissue phantoms type A).

**Citation:** Vardaki, M.Z.; Seretis, K.; Gaitanis, G.; Bassukas, I.D.; Kourkouvelis, N. Assessment of Skin Deep Layer Biochemical Profile Using Spatially Offset Raman Spectroscopy. *Appl. Sci.* **2021**, *11*, 9498. <https://doi.org/10.3390/app11209498>

Academic Editor: Jongsung Lee

Received: 9 September 2021

Accepted: 10 October 2021

Published: date

**Publisher's Note:** MDPI stays neutral with regard to jurisdictional claims in published maps and institutional affiliations.

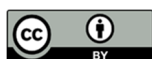

**Copyright:** © 2021 by the authors. Submitted for possible open access publication under the terms and conditions of the Creative Commons Attribution (CC BY) license (<https://creativecommons.org/licenses/by/4.0/>).

**Table S1.** Raman band assignments of healthy eyelid and scalp human skin layers.

| Raman band (cm <sup>-1</sup> ) | Assignment                                                                                                                                           | Skin layer       | Reference |
|--------------------------------|------------------------------------------------------------------------------------------------------------------------------------------------------|------------------|-----------|
| 492                            | nucleic acids (guanine, thymine); amino acids (cystine, glycine) from proteins                                                                       | all              | [1]       |
| 620                            | Ring breathing (Phenylalanine)                                                                                                                       | all              | [2]       |
| 643                            | Ring breathing (tyrosine), C-S stretching (cysteine)                                                                                                 | all              | [2]       |
| 722                            | C-S stretching (protein); C-N stretching of choline (membrane phospholipid head—phospholipids); nucleic acids (adenine); CH <sub>2</sub> rocking     | all              | [1,2]     |
| 757                            | symmetrical stretching O-P-O, phospholipids                                                                                                          | all              | [2]       |
| 852                            | v(C-C) of proline, v(C-C) vibration of the collagen backbone                                                                                         | all              | [3-7]     |
| 872                            | v(C-C) of hydroxyproline                                                                                                                             | all              | [3-6]     |
| 939                            | Proline, Hydroxyproline, v(C-C) vibration of the collagen backbone                                                                                   | all              | [3-6]     |
| 972                            | =C-H bending mode in unsaturated fatty chains                                                                                                        | Subcutaneous fat | [8]       |
| 1004                           | C-C stretching of aromatic ring breathing mode of phenylalanine                                                                                      | all              | [1]       |
| 1031                           | CH in-plane bending (phenylalanine)                                                                                                                  | all              | [9]       |
| 1063                           | C-C bending modes of the lipid skeleton                                                                                                              |                  | [8]       |
| 1083                           | v(C-C) or v(C-O), phospholipids (lipid assignment), phosphate vibrations (phosphodiester groups in nucleic acids), nucleic acids                     | Subcutaneous fat | [10]      |
| 1123                           | C-C skeletal stretching of acyl backbone of lipids                                                                                                   | Subcutaneous fat | [1,8]     |
| 1170                           | CH, Tyrosine, Phenylalanine                                                                                                                          | all              | [2]       |
| 1245                           | Amide III (β-sheet and random coil conformations)—C-N stretching and CH <sub>2</sub> wagging; PO <sub>2</sub> asymmetric stretching in nucleic acids | all              | [1]       |
| 1258                           | Lipids (doublet with the 1297 peak), amide III, adenine, cytosine                                                                                    | Subcutaneous fat | [10]      |
| 1268                           | Amide III (α-helix conformation)—C-N stretching and N-H in-plane bending (proteins); ¼ C-H ethylene deformations—cis                                 | all              | [1]       |

|             |                                                                                                                                                                                                                                                |                  |        |
|-------------|------------------------------------------------------------------------------------------------------------------------------------------------------------------------------------------------------------------------------------------------|------------------|--------|
|             | conformation from unsaturated fatty acids (triolein and phospholipids);                                                                                                                                                                        |                  |        |
| 1303        | CH modes (CH <sub>2</sub> twisting and wagging) of lipids and collagen; C – H bending (cis conformation) of lipids; amide III mode ( $\alpha$ -helix conformation) – C-N stretching and N-H in-plane bending (proteins)                        | Subcutaneous fat | [1]    |
| 1318        | CH <sub>2</sub> twisting and wagging of proteins and lipids; amide III (C-N asymmetric stretching and C-H deformation) of proteins; nucleic acids (ring breathing mode of guanine)                                                             | all              | [1]    |
| 1339        | $\nu$ CC, CH bend (Phe, Trp), purine stretching (DNA, RNA)                                                                                                                                                                                     | all              | [2,11] |
| 1439        | Cholesterol, fatty acids, $\delta$ CH <sub>2</sub> , $\delta$ CH <sub>3</sub>                                                                                                                                                                  | Subcutaneous fat | [10]   |
| 1450        | CH modes (CH <sub>2</sub> and CH <sub>3</sub> deformations – bending and scissoring) – proteins and lipids (including cholesterol)                                                                                                             | all              | [1,10] |
| 1554        | Amide II ( $\nu$ (C-N) and $\delta$ (N-H))                                                                                                                                                                                                     | all              | [12]   |
| 1656 - 1662 | C = O stretching of amide I ( $\alpha$ -helix, $\beta$ -sheet and random coil conformations) of structural proteins; C = C alkyl stretching of lipids – cis conformation; C = C stretching of squalene (strong peak at 1670 cm <sup>-1</sup> ) | all              | [1]    |
| 1746        | C=O stretching mode (ester group in glycerol heads of TAG)                                                                                                                                                                                     | Subcutaneous fat | [8]    |

1. L. Silveira, Jr., F.L. Silveira, B. Bodanese, R.A. Zangaro, M.T. Pacheco, Discriminating model for diagnosis of basal cell carcinoma and melanoma in vitro based on the Raman spectra of selected biochemicals, *J Biomed Opt*, 17 (2012) 077003.
2. A. Tfayli, O. Piot, F. Draux, F. Pitre, M. Manfait, Molecular characterization of reconstructed skin model by Raman microspectroscopy: Comparison with excised human skin, *Biopolymers*, 87 (2007) 261-274.
3. A.M.F. Lima, C.R. Daniel, R.S. Navarro, B. Bodanese, C.A. Pasqualucci, M.T.T. Pacheco, R.A. Zangaro, L. Silveira, Discrimination of non-melanoma skin cancer and keratosis from normal skin tissue in vivo and ex vivo by Raman spectroscopy, *Vibrational Spectroscopy*, 100 (2019) 131-141.
4. C.A. Tellez-Soto, M.G.P. Silva, L. dos Santos, T.D. Mendes, P. Singh, S.A. Fortes, P. Favero, A.A. Martin, In vivo determination of dermal water content in chronological skin aging by confocal Raman spectroscopy, *Vibrational Spectroscopy*, 112 (2021).
5. A. Villaret, C. Ipinazar, T. Satar, E. Gravier, C. Mias, E. Questel, A.M. Schmitt, V. Samouillan, F. Nadal, G. Josse, Raman characterization of human skin aging, *Skin Res Technol*, 25 (2019) 270-276.

6. C.A.T. Soto, L. Pereira, L. dos Santos, R. Rajasekaran, P. Favero, A.A. Martin, DFT:B3LYP/3-21G theoretical insights on the confocal Raman experimental observations in skin dermis of healthy young, healthy elderly, and diabetic elderly women, *Journal of Biomedical Optics*, 21 (2016).
7. P.J. Caspers, G.W. Lucassen, R. Wolthuis, H.A. Bruining, G.J. Puppels, In vitro and in vivo Raman spectroscopy of human skin, *Biospectroscopy*, 4 (1998) S31-S39.
8. P. Meksiarun, B.B. Andriana, H. Matsuyoshi, H. Sato, Non-invasive Quantitative Analysis of Specific Fat Accumulation in Subcutaneous Adipose Tissues using Raman Spectroscopy, *Scientific Reports*, 6 (2016).
9. S.M. Ali, F. Bonnier, A. Tfayli, H. Lambkin, K. Flynn, V. McDonagh, C. Healy, T.C. Lee, F.M. Lyng, H.J. Byrne, Raman spectroscopic analysis of human skin tissue sections ex-vivo: evaluation of the effects of tissue processing and dewaxing, *Journal of Biomedical Optics*, 18 (2013).
10. S. Tfaili, C. Gobinet, G. Josse, J.F. Angiboust, M. Manfait, O. Piot, Confocal Raman microspectroscopy for skin characterization: a comparative study between human skin and pig skin, *Analyst*, 137 (2012) 3673-3682.
11. S.A. Overman, K.L. Aubrey, K.E. Reilly, O. Osman, S.J. Hayes, P. Serwer, G.J. Thomas, Conformation and interactions of the packaged double-stranded DNA genome of bacteriophage T7, *Biospectroscopy*, 4 (1998) S47-S56.
12. G. Pezzotti, M. Boffelli, D. Miyamori, T. Uemura, Y. Marunaka, W. Zhu, H. Ikegaya, Raman spectroscopy of human skin: looking for a quantitative algorithm to reliably estimate human age, *J Biomed Opt*, 20 (2015) 065008.
