# Supplementary material for: Assessment of Skin Deep Layer Biochemical Profile Using Spatially Offset Raman Spectroscopy
Source: MDPI journal article supplement (doi:10.3390/app11209498), 2021-10-13
Supplement: s1 [file s1]

Archive with 1 entries (1 files):
- applsci-1395321-supplementary.pdf
